# Supplementary material for: Experimental and simulation study of reverse micelles formed by aerosol-OT and water in non-polar solvents
Source: Royal Society of Chemistry journal article supplement (doi:10.1039/d4cp03389b), 2024-01-01
Supplement: d4cp03389b1.pdf [file d4cp03389b1.pdf]

**Experimental and simulation study of reverse micelles formed by  
Aerosol-OT and water in non-polar solvents: Electronic  
Supplementary Information**

Angie Maľusová,<sup>1</sup> Georgina Moody,<sup>2</sup> Peter J.  
Dowding,<sup>3</sup> Julian Eastoe,<sup>2</sup> and Philip J. Camp<sup>1,\*</sup>

<sup>1</sup>*School of Chemistry, University of Edinburgh,  
David Brewster Road, Edinburgh EH9 3FJ, Scotland*

<sup>2</sup>*School of Chemistry, University of Bristol,  
Cantock's Close, Bristol BS8 1TS, UK*

<sup>3</sup>*Infineum UK Ltd, Milton Hill, UK*

(Dated: October 1, 2024)

---

\* Corresponding author: philip.camp@ed.ac.uk

## OPLS-AA AND CHARGE PARAMETERS FOR AEROSOL-OT

The atom labelling scheme for Aerosol-OT (AOT,  $C_{20}H_{37}NaO_7S$ ) is shown in Fig. S1.

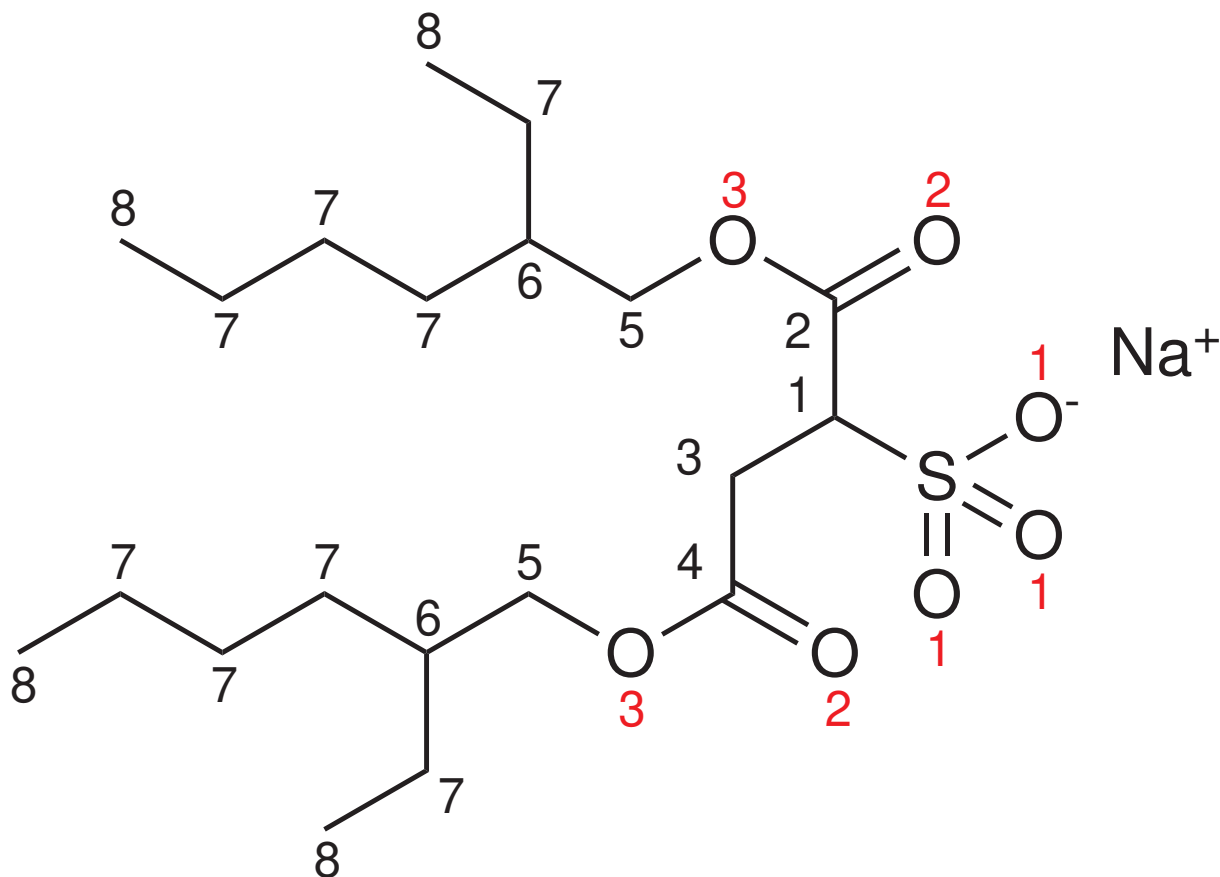

Figure S1. Aerosol-OT molecule with labels used for the purposes of parameterization. Oxygen atom numbers are indicated in red, and carbon and hydrogen atom numbers are in black.

The OPLS-AA Lennard-Jones parameters for the AOT atoms in the sulfonate group were taken from the work by Abdel-Azeim [1]. These are given in Table S1. The partial charges of AOT atoms from C5 and H5 on one side chain to C5 and H5 on the other were determined using DFT calculations as detailed in Section 2.2 of the main article. These are given in Table S2. All other parameters, for AOT and solvents, were taken from the L-OPLS-AA force field [2–6]. Water was described using the TIP3P (Ewald) model [7].

Table S1. Lennard-Jones force field parameters for the sulfonate group, taken from Ref. 1.

| label | $\epsilon$ [kcal/mol] | $\sigma$ [Å] |
|-------|-----------------------|--------------|
| O1    | 0.17                  | 2.96         |
| O2    | 0.21                  | 2.96         |
| O3    | 0.17                  | 3.00         |
| S     | 0.25                  | 3.55         |

Table S2. Partial charges for the AOT molecule. Values from C5 and H5 on one side chain to C5 and H5 on the other were calculated from DFT geometry optimization. Values for the tail-group atoms, C6–C8 and H6–H8, were taken from the L-OPLS-AA force field [2–6].

| label | charge [e] | index | charge [e] |
|-------|------------|-------|------------|
| C1    | −0.073     | H1    | 0.07       |
| C2    | 0.45       |       |            |
| C3    | 0.416      | H3    | 0.03       |
| C4    | −0.148     |       |            |
| C5    | 0.2305     | H5    | 0.03       |
| C6    | −0.06      | H6    | 0.06       |
| C7    | −0.12      | H7    | 0.06       |
| C8    | −0.18      | H8    | 0.06       |
| Na    | 1          |       |            |
| O1    | −0.66      |       |            |
| O2    | −0.423     |       |            |
| O3    | −0.345     |       |            |
| S     | 1.16       |       |            |

- 
- [1] S. Abdel-Azeim, J. Chem. Theory Comput. **16**, 1136 (2020).
  - [2] W. L. Jorgensen, J. D. Madura, and C. J. Swenson, J. Am. Chem. Soc. **106**, 6638 (1984).
  - [3] W. L. Jorgensen and J. Tirado-Rives, J. Am. Chem. Soc. **110**, 1657 (1988).
  - [4] W. L. Jorgensen, D. S. Maxwell, and J. Tirado-Rives, J. Am. Chem. Soc. **118**, 11225 (1996).
  - [5] W. Damm, A. Frontera, J. Tirado-Rives, and W. L. Jorgensen, J. Comp. Chem. **18**, 1955 (1997).
  - [6] S. W. I. Siu, K. Pluhackova, and R. A. Böckmann, J. Chem. Theory Comput. **8**, 1459 (2012).
  - [7] D. J. Price and C. L., III. Brooks, J. Chem. Phys. **121**, 10096 (2004).
